# Supplementary material
Source: Springer Nature journal article supplement (https://www.springermedizin.de/resource/supplementary/12943_2010_886_MOESM2_ESM.PDF/9551930)

**Supplemental Figure 2** RING mutant POSH expression does not affect sensitivity to TRAIL-mediated apoptosis. PPC-1 cells stably expressing rmPOSH were treated with TRAIL for 16 hours (100 ng/mL) and annexin V stained to determine percent apoptosis. All values indicate the mean percent annexin V positive cells +/- the standard deviation.

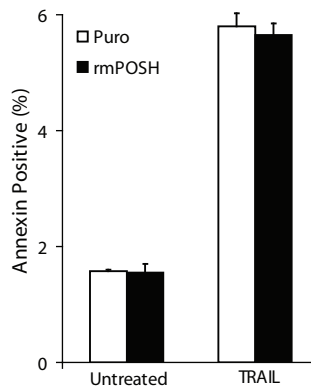

Supplement: MOESM2 [file 9551930]
